# Supplementary material
Source: PubMed Central journal article supplement (PMC3225046)
Supplement: Supp_Data.pdf [file Supp_Data.pdf]

## Supplementary Data

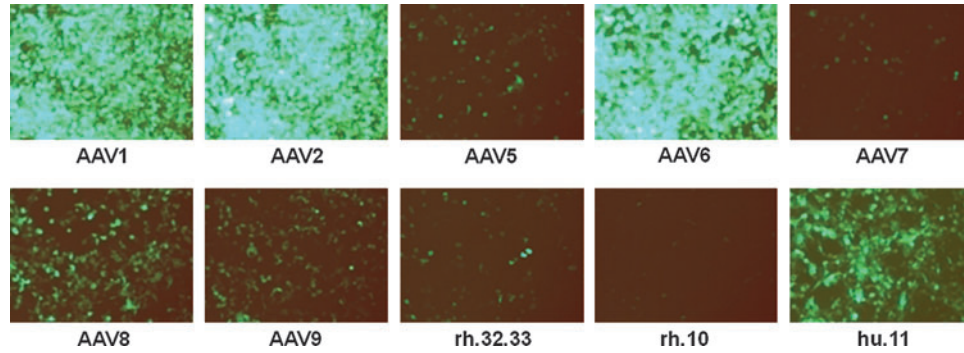

**SUPPLEMENTARY FIG. S1.** *In vitro* transduction efficiency by different AAV serotypes and isolates. AAV vectors expressing CMV.EGFP.WPRE were inoculated on confluent HEK293 cells at an MOI of  $10^4$  GC for 48 hr, after which micrographs under direct fluorescence were taken at identical exposure settings for all vectors.

**SUPPLEMENTARY TABLE 1. ANTI-AAV8 TOTAL IGG IN THE MACAQUES BEFORE VECTOR ADMINISTRATION**

| <i>Species</i>     | <i>Animal no.</i> | <i>AAV8 NAb (1: dilution)</i> | <i>Anti-AAV8 IgG (1: dilution)</i> |       |
|--------------------|-------------------|-------------------------------|------------------------------------|-------|
| Cynomolgus (adult) | 02-07             | <1:5                          | 1:100                              |       |
|                    | 086-356           | <1:5                          | 1:200                              |       |
|                    | 086-367           | <1:5                          | 1:1600                             |       |
|                    | C13991            | <1:5                          | 1:100                              |       |
|                    | C13992            | <1:5                          | 1:100                              |       |
|                    | C11722            | 1:5                           | 1:400                              |       |
|                    | 054-1040          | 1:10                          | 1:800                              |       |
|                    | 04-01             | 1:10                          | 1:400                              |       |
| Rhesus (adult)     | 02C068            | <1:5                          | 1:200                              |       |
|                    | 03D099            | <1:5                          | <1:100                             |       |
|                    | 03D233            | <1:5                          | 1:400                              |       |
|                    | 03D352            | 1:5                           | 1:400                              |       |
|                    | 02D276            | 1:20                          | 1:3200                             |       |
|                    | 03C041            | 1:40                          | 1:3200                             |       |
|                    | 21537             | 1:80                          | 1:6400                             |       |
|                    | 03C113            | 1:80                          | 1:6400                             |       |
|                    | Rhesus (juvenile) | RQ8082                        | <1:5                               | 1:400 |
|                    |                   | RQ8086                        | <1:5                               | 1:200 |
| RQ8083             |                   | <1:5                          | 1:400                              |       |
| RQ8085             |                   | 1:10                          | 1:400                              |       |
| RQ8124             |                   | 1:20                          | 1:3200                             |       |
